# Supplementary material
Source: ML conference proceedings conference paper supplement (https://openreview.net/forum?id=nwqaILb1vf)
Supplement: supplementary_material [file TopoTTA_supplementary material.pdf › TopoTTA_supplementary material.pdf]

---

# **Learning Topology-Aware Representations via Test-Time Adaptation for Anomaly Segmentation - Supplementary Material**

---

**Anonymous Author(s)**

Affiliation

Address

email

# 1 Supplementary Material

## 2 1.1 2D AD&S

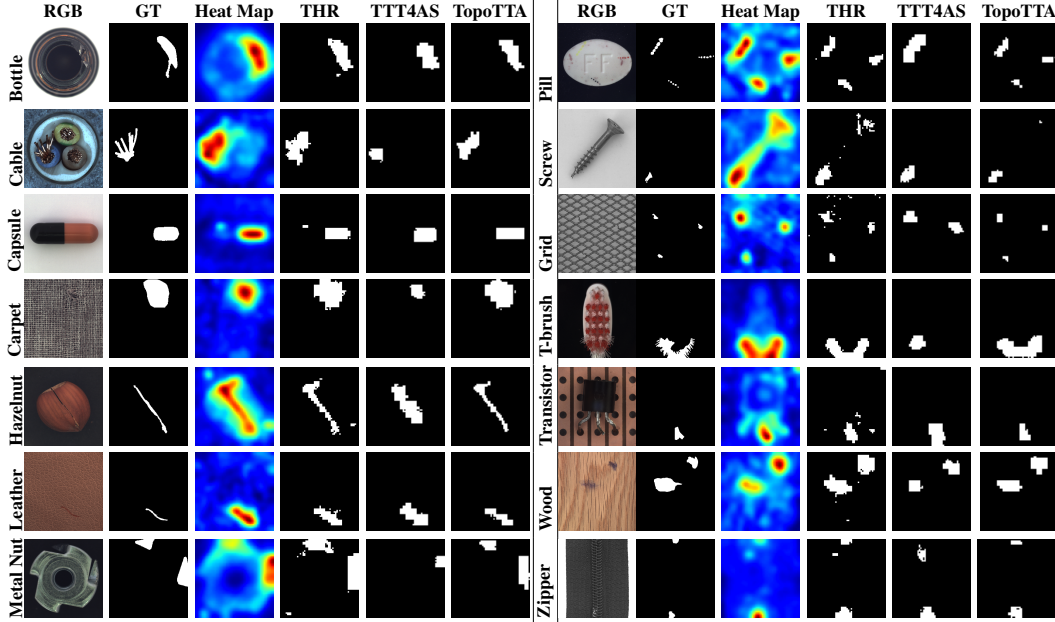

Figure 1: Qualitative comparison of various anomaly detection methods for different objects using PaDiM [1] model on 2D MvTec AD dataset.

Table 1: Performance evaluation of PaDiM [1] across 15 categories of the MVTec AD dataset and their mean, comparing three binary map strategies: (a) THR ( $\mu + 3\sigma$ ), (b) TTT4AS, and (c) TopoTTA. The table highlights the best result for each Precision, Recall, and F1 Score metric in **bold black** and the second-best in **blue**.

| Metric                                               | Bottle | Cable | Capsule | Carpet | Grid  | Hazelnut | Leather | MetalNut | Pill  | Screw | Tile  | T-brush | Transistor | Wood  | Zipper | Mean  |
|------------------------------------------------------|--------|-------|---------|--------|-------|----------|---------|----------|-------|-------|-------|---------|------------|-------|--------|-------|
| (a) PaDiM - Binary Map - THR ( $\mu + 3\sigma$ ) [2] |        |       |         |        |       |          |         |          |       |       |       |         |            |       |        |       |
| Precision                                            | 0.729  | 0.580 | 0.287   | 0.561  | 0.327 | 0.586    | 0.306   | 0.540    | 0.410 | 0.196 | 0.131 | 0.416   | 0.462      | 0.576 | 0.676  | 0.452 |
| Recall                                               | 0.321  | 0.249 | 0.813   | 0.736  | 0.708 | 0.477    | 0.927   | 0.281    | 0.493 | 0.712 | 0.005 | 0.514   | 0.349      | 0.399 | 0.615  | 0.506 |
| F1 Score                                             | 0.343  | 0.280 | 0.325   | 0.523  | 0.407 | 0.433    | 0.396   | 0.292    | 0.337 | 0.295 | 0.009 | 0.391   | 0.307      | 0.375 | 0.596  | 0.392 |
| (b) PaDiM - Binary Map - TTT4AS [3]                  |        |       |         |        |       |          |         |          |       |       |       |         |            |       |        |       |
| Precision                                            | 0.585  | 0.412 | 0.176   | 0.429  | 0.199 | 0.349    | 0.208   | 0.519    | 0.269 | 0.088 | 0.137 | 0.258   | 0.472      | 0.355 | 0.499  | 0.330 |
| Recall                                               | 0.438  | 0.500 | 0.707   | 0.769  | 0.726 | 0.637    | 0.916   | 0.491    | 0.568 | 0.735 | 0.123 | 0.595   | 0.425      | 0.416 | 0.648  | 0.579 |
| F1 Score                                             | 0.429  | 0.395 | 0.214   | 0.459  | 0.290 | 0.376    | 0.293   | 0.386    | 0.262 | 0.153 | 0.103 | 0.283   | 0.291      | 0.319 | 0.512  | 0.317 |
| (c) PaDiM - Binary Map - TopoTTA                     |        |       |         |        |       |          |         |          |       |       |       |         |            |       |        |       |
| Precision                                            | 0.750  | 0.648 | 0.355   | 0.523  | 0.463 | 0.358    | 0.246   | 0.574    | 0.307 | 0.266 | 0.685 | 0.268   | 0.492      | 0.439 | 0.678  | 0.470 |
| Recall                                               | 0.689  | 0.670 | 0.828   | 0.942  | 0.805 | 0.885    | 0.987   | 0.636    | 0.783 | 0.905 | 0.742 | 0.920   | 0.547      | 0.756 | 0.724  | 0.787 |
| F1 Score                                             | 0.718  | 0.658 | 0.496   | 0.672  | 0.587 | 0.509    | 0.393   | 0.603    | 0.441 | 0.411 | 0.712 | 0.415   | 0.518      | 0.555 | 0.700  | 0.559 |

## 3 References

- [1] T. Defard, A. Setkov, A. Loesch, and R. Audigier, “Padim: a patch distribution modeling framework for anomaly detection and localization,” in *International Conference on Pattern Recognition*, pp. 475–489, Springer, 2021.
- [2] K. Roth, L. Pemula, J. Zepeda, B. Schölkopf, T. Brox, and P. Gehler, “Towards total recall in industrial anomaly detection,” in *Proceedings of the IEEE/CVF conference on computer vision and pattern recognition*, pp. 14318–14328, 2022.
- [3] A. Costanzino, P. Z. Ramirez, M. Del Moro, A. Aiezzo, G. Lisanti, S. Salti, and L. Di Stefano, “Test time training for industrial anomaly segmentation,” in *Proceedings of the IEEE/CVF Conference on Computer Vision and Pattern Recognition*, pp. 3910–3920, 2024.
